# Supplementary material for: Prevalence and factors associated with medication adherence among patients with hypertension in sub-Saharan Africa: protocol for a systematic review and meta-analysis
Source: PubMed Central journal article supplement — BMJ Open. 2018 Mar 16;8(3):e020715. doi: 10.1136/bmjopen-2017-020715 (PMC5857663; doi:10.1136/bmjopen-2017-020715), 2018-03-16
Supplement: bmjopen-2017-020715supp001.pdf [file bmjopen-2017-020715supp001.pdf]

## Quality assessment checklist for prevalence studies (adapted from Hoy et al)

| Name of author(s):                                                                                                                                            |                                                                                                                                                                                                                                               |               |
|---------------------------------------------------------------------------------------------------------------------------------------------------------------|-----------------------------------------------------------------------------------------------------------------------------------------------------------------------------------------------------------------------------------------------|---------------|
| Year of publication:                                                                                                                                          |                                                                                                                                                                                                                                               |               |
| Study title:                                                                                                                                                  |                                                                                                                                                                                                                                               |               |
| Risk of bias items                                                                                                                                            | Risk of bias levels                                                                                                                                                                                                                           | Points scored |
| 1. Was the study's target population a close representation of the national population in relation to relevant variables, e.g. age, sex, occupation?          | <b>Yes (LOW RISK):</b> The study's target population was a close representation of the national population.                                                                                                                                   | 0             |
|                                                                                                                                                               | <b>No (HIGH RISK):</b> The study's target population was clearly NOT representative of the national population.                                                                                                                               | 1             |
| 2. Was the sampling frame a true or close representation of the target population?                                                                            | <b>Yes (LOW RISK):</b> The sampling frame was a true or close representation of the target population.                                                                                                                                        | 0             |
|                                                                                                                                                               | <b>No (HIGH RISK):</b> The sampling frame was NOT a true or close representation of the target population.                                                                                                                                    | 1             |
| 3. Was some form of random selection used to select the sample, OR, was a census undertaken?                                                                  | <b>Yes (LOW RISK):</b> A census was undertaken, OR, some form of random selection was used to select the sample (e.g. simple random sampling, stratified random sampling, cluster sampling, systematic sampling).                             | 0             |
|                                                                                                                                                               | <b>No (HIGH RISK):</b> A census was NOT undertaken, AND some form of random selection was NOT used to select the sample.                                                                                                                      | 1             |
| 4. Was the likelihood of non-response bias minimal?                                                                                                           | <b>Yes (LOW RISK):</b> The response rate for the study was $\geq 75\%$ , OR, an analysis was performed that showed no significant difference in relevant demographic characteristics between responders and non-responders                    | 0             |
|                                                                                                                                                               | <b>No (HIGH RISK):</b> The response rate was $<75\%$ , and if any analysis comparing responders and non-responders was done, it showed a significant difference in relevant demographic characteristics between responders and non-responders | 1             |
| 5. Were data collected directly from the subjects (as opposed to a proxy)?                                                                                    | <b>Yes (LOW RISK):</b> All data were collected directly from the subjects.                                                                                                                                                                    | 0             |
|                                                                                                                                                               | <b>No (HIGH RISK):</b> In some instances, data were collected from a proxy.                                                                                                                                                                   | 1             |
| 6. Was an acceptable case definition used in the study?                                                                                                       | <b>Yes (LOW RISK):</b> An acceptable case definition was used.                                                                                                                                                                                | 0             |
|                                                                                                                                                               | <b>No (HIGH RISK):</b> An acceptable case definition was NOT used                                                                                                                                                                             | 1             |
| 7. Was the study instrument that measured the parameter of interest (e.g. prevalence of low back pain) shown to have reliability and validity (if necessary)? | <b>Yes (LOW RISK):</b> The study instrument had been shown to have reliability and validity (if this was necessary), e.g. test-re-test, piloting, validation in a previous study, etc.                                                        | 0             |
|                                                                                                                                                               | <b>No (HIGH RISK):</b> The study instrument had NOT been shown to have reliability or validity (if this was necessary).                                                                                                                       | 1             |
| 8. Was the same mode of data collection used for all subjects?                                                                                                | <b>Yes (LOW RISK):</b> The same mode of data collection was used for all subjects.                                                                                                                                                            | 0             |
|                                                                                                                                                               | <b>No (HIGH RISK):</b> The same mode of data collection was NOT used for all subjects.                                                                                                                                                        | 1             |
| 9. Were the numerator(s) and denominator(s) for the parameter of interest appropriate                                                                         | <b>Yes (LOW RISK):</b> The paper presented appropriate numerator(s) AND denominator(s) for the parameter of interest (e.g. the prevalence of low back pain).                                                                                  | 0             |
|                                                                                                                                                               | <b>No (HIGH RISK):</b> The paper did present numerator(s) AND denominator(s) for the parameter of interest but one or more of these were inappropriate.                                                                                       | 1             |
| 10. Summary on the overall risk of study bias                                                                                                                 | <b>LOW RISK</b>                                                                                                                                                                                                                               | 0-3           |
|                                                                                                                                                               | <b>MODERATE RISK</b>                                                                                                                                                                                                                          | 4-6           |
|                                                                                                                                                               | <b>HIGH RISK</b>                                                                                                                                                                                                                              | 7-9           |
